# Supplementary material for: Methods using Marine Aquatic Photoautotrophs Along the Qatari Coastline to Remediate Oil and Gas Industrial Water
Source: Preprints.org preprint supplement (doi:10.20944/preprints202407.1984.v1), 2024-07-25
Supplement: Supplementary file 2 [file supplementary]

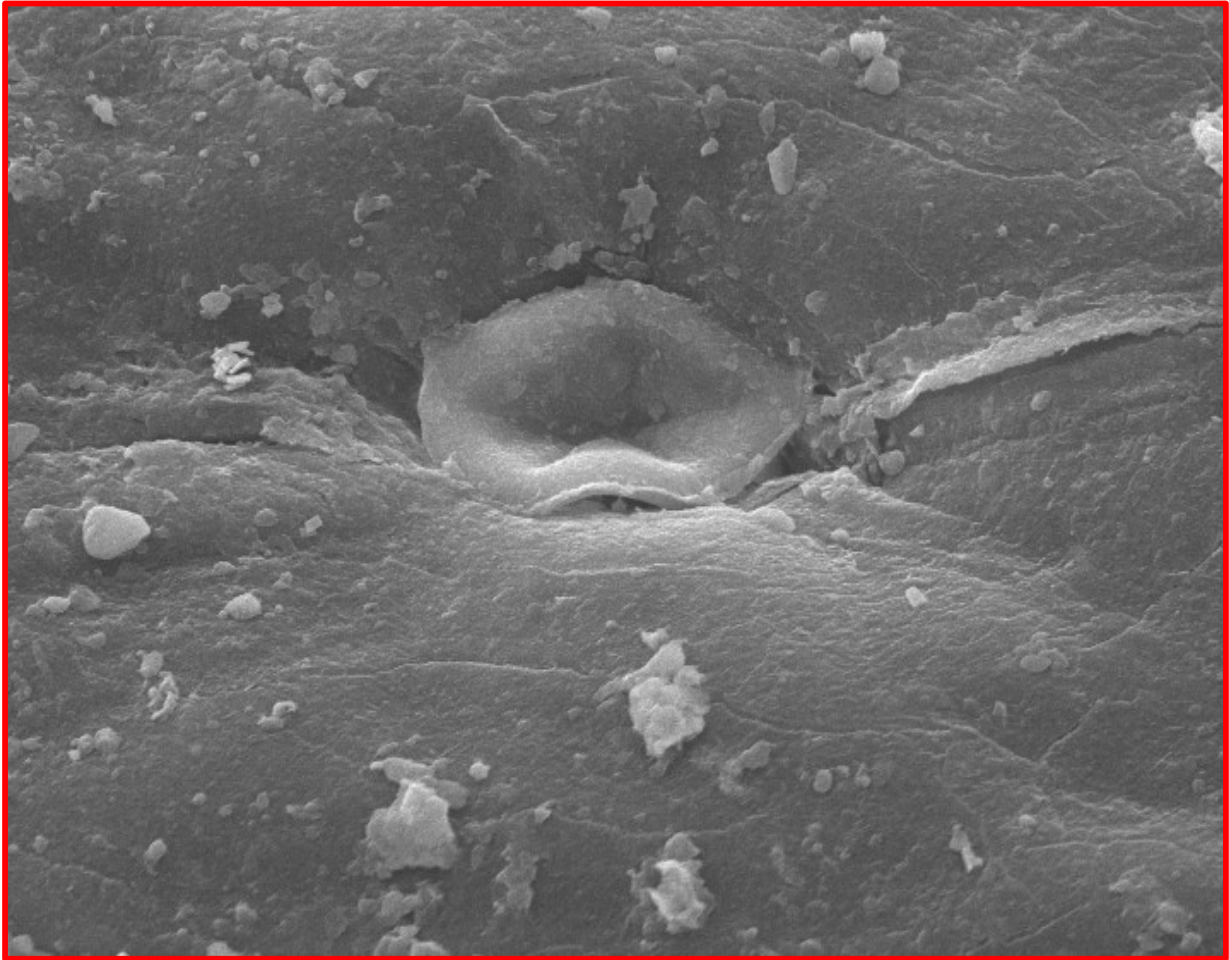

Supplementary Figure 3. SEM of the adaxial surface (upper side) of leaves of *A. marina*, scattered salt crystals are found (with magnification of X1200).
