# Supplementary material for: Methods using Marine Aquatic Photoautotrophs Along the Qatari Coastline to Remediate Oil and Gas Industrial Water
Source: Preprints.org preprint supplement (doi:10.20944/preprints202407.1984.v1), 2024-07-25
Supplement: Supplementary file 3 [file supplementary]

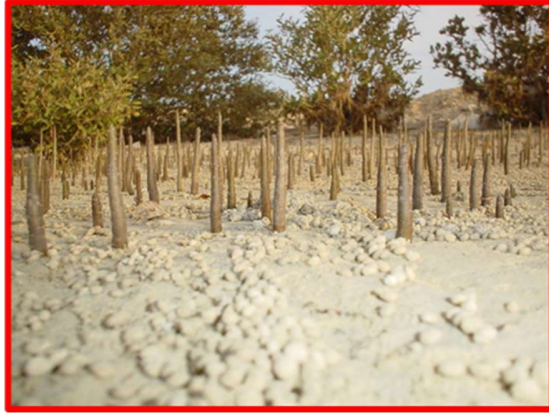

Supplementary Figure 1. A cable network of breathing roots (pneumatophores) that support the growth of plants in this stressful habitat.
